# Supplementary material
Source: publisher figshare collection journal article supplement (https://acs.figshare.com/ndownloader/files/5772390)
Supplement: Supplementary file 1 [file 5772390]

Journal of  
**Medicinal Chemistry**

J. Med. Chem., 1996, 39(19), 3694-3700, DOI:[10.1021/jm9603882](https://doi.org/10.1021/jm9603882)

**Terms & Conditions**

Electronic Supporting Information files are available without a subscription to ACS Web Editions. The American Chemical Society holds a copyright ownership interest in any copyrightable Supporting Information. Files available from the ACS website may be downloaded for personal use only. Users are not otherwise permitted to reproduce, republish, redistribute, or sell any Supporting Information from the ACS website, either in whole or in part, in either machine-readable form or any other form without permission from the American Chemical Society. For permission to reproduce, republish and redistribute this material, requesters must process their own requests via the RightsLink permission system. Information about how to use the RightsLink permission system can be found at <http://pubs.acs.org/page/copyright/permissions.html>

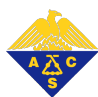

**ACS Publications**  
MOST TRUSTED. MOST CITED. MOST READ.

Copyright © 1996 American Chemical Society

JM 9603882

**Supplementary information**

Lists of compounds used to validate the maximum size of MAO-B active site.

**4-phenyl-R-substituted MPTP derivatives.**

All of them have the same length as MPTP (1) (10.07 Å) and are issued from references 12 and 14

| R                 | kcat/Km |
|-------------------|---------|
| 2-Me              | 1275    |
| 2-Et              | 295     |
| 2-n-Pr            | 86      |
| 2-OMe             | 233     |
| 2-Cl              | 1353    |
| 2-i-Pr            | 53      |
| 2-CF <sub>3</sub> | 520     |

| R                 | kcat/Km |
|-------------------|---------|
| 2,6-diMe          | 209     |
| 3-Me              | 650     |
| 3-F               | 900     |
| 3-Cl              | 1132    |
| 3-Br              | 2036    |
| 3-OMe             | 944     |
| 3-CF <sub>3</sub> | 514     |

**4-(R-substituted-phenoxy)-N-methyl-1,2,3,6-tetrahydropyridine and 4-(aryloxy)-N-methyl-1,2,3,6-tetrahydropyridine derivatives.**

All of them have the same length as 4-phenoxy derivative 33 (6.60 Å) and are issued from reference 28 and 6

| R                  | kcat/Km |
|--------------------|---------|
| 2'-Me              | 1782    |
| 2'-NO <sub>2</sub> | 786     |
| 2'-OMe             | 746     |
| 2'-Cl              | 822     |
| 2'-Ph              | 132     |
| 3'-Me              | 1747    |
| 3'-NO <sub>2</sub> | 1410    |
| 3'-OMe             | 721     |
| 3'-Cl              | 729     |
| 3'-Ph              | 637     |

| R                  | kcat/Km |
|--------------------|---------|
| 4'-Me              | 2019    |
| 4'-NO <sub>2</sub> | 191     |
| 4'-OMe             | 746     |
| 4'-Cl              | 1401    |
| 4'-Ph              | 363     |
| 4'-n-Bu            | 1090    |
| 4'-t-Bu            | 395     |
| 4-a-Naph           | 565     |
| 4-b-Naph           | 1214    |

**4-(R-substituted-benzyl)-N-methyl-1,2,3,6-tetrahydropyridine and 4-(arylmethyl)-N-methyl-1,2,3,6-tetrahydropyridine derivatives.**

All of them have the same length as 4-benzyl derivative **25** (6.72 Å) and are issued from reference <sup>32</sup>

| R     | kcat/Km |
|-------|---------|
| 2-F   | 1440    |
| 2-OMe | 145     |
| 3-Me  | 603     |
| 3-F   | 2330    |
| 4-Me  | 615     |

| R       | kcat/Km  |
|---------|----------|
| 4-F     | 1140     |
| 4-I     | 1190     |
| -a-Naph | 105      |
| -b-Naph | 310      |
| -9-Phen | inactive |

**4-(R-substituted-phenylethenyl)-N-methyl-1,2,3,6-tetrahydropyridine and 4-(arylethenyl)-N-methyl-1,2,3,6-tetrahydropyridine derivatives.**

All of *cis* isomers have the same length as 4-phenylethenyl derivative **31** (7.96 Å), all of the *trans* isomers have the same length as 4-phenylethenyl derivative **30** (12.16 Å) and are issued from reference <sup>31</sup> and <sup>21</sup>

| R ( <i>cis</i> ) | kcat/Km |
|------------------|---------|
| 2'-Br            | 107     |
| 2'-OMe           | 93      |
| 3'-Br            | 1056    |
| 4'-Br            | 890     |
| -a-Naph          | 49      |

| R ( <i>trans</i> )    | kcat/Km |
|-----------------------|---------|
| 2'-OMe                | 16      |
| 2'-Br                 | 617     |
| 2'-Me                 | < 10%   |
| 3'-Br                 | 6       |
| 4'-Br                 | 98      |
| 4'-F                  | 138     |
| 4'-Me                 | 59      |
| 4'-N(Me) <sub>2</sub> | 67      |
| 4'-OMe                | 53      |
| -a-Naph               | 21      |

**N-R<sub>1</sub>-4-R<sub>2</sub>-1,2,3,6-tetrahydropyridine derivatives.**

Data are issued from reference 32, 5, 15, 3, 10, 12

| R <sub>1</sub> | R <sub>2</sub>    | kcat/Km  | Length |
|----------------|-------------------|----------|--------|
| Me             | methyl-thien-2-yl | 3270     | 8.0    |
| Me             | a-naphthylethyl   | 62       | 7.8    |
| Me             | b-naphthylethyl   | 76       | 7.8    |
| Me             | ethyl-thien-2-yl  | 1059     | 8.4    |
| Me             | thien-3-yl        | 160      | 8.5    |
| Me             | methyl-thien-3-yl | 785      | 8.1    |
| Me             | ethyl-thien-3-yl  | 890      | 7.8    |
| Me             | ethyl             | 41 %     | / 7.8  |
| n-butyl        | phenyl            | MPTP     | 13.5   |
| cPr methyl     | phenyl            | inactive | 12.2   |
| 2-ethanol      | phenyl            | inactive | 12.0   |
|                |                   | inactive |        |
